# Supplementary material for: Doping-free bandgap tuning in one-dimensional Magnéli-phase nanorods of Mo4O11
Source: Royal Society of Chemistry journal article supplement (doi:10.1039/c5nr08118a), 2016-01-01
Supplement: c5nr08118a1.pdf [file c5nr08118a1.pdf]

## Supplementary Information

### Doping-free bandgap tuning in one-dimensional Magnéli-phase nanorods of $\text{Mo}_4\text{O}_{11}$

Duy Van Pham,<sup>a</sup> Ranjit A. Patil,<sup>\*\*a</sup> Jin-Han Lin,<sup>b</sup> Chien-Chih Lai,<sup>a</sup> Yung Liou,<sup>b</sup> and Yuan-Ron Ma<sup>\*a</sup>

<sup>a</sup>Department of Physics, National Dong Hwa University, Hualien 97401, Taiwan

<sup>b</sup>Institute of Physics, Academia Sinica, Taipei 11529, Taiwan

\*Corresponding author: Prof. Yuan-Ron Ma, E-mail: [ronma@mail.ndhu.edu.tw](mailto:ronma@mail.ndhu.edu.tw)

\*\*Co-corresponding author: Dr. Ranjit A. Patil, E-mail: [ranajit27@gmail.com](mailto:ranajit27@gmail.com)

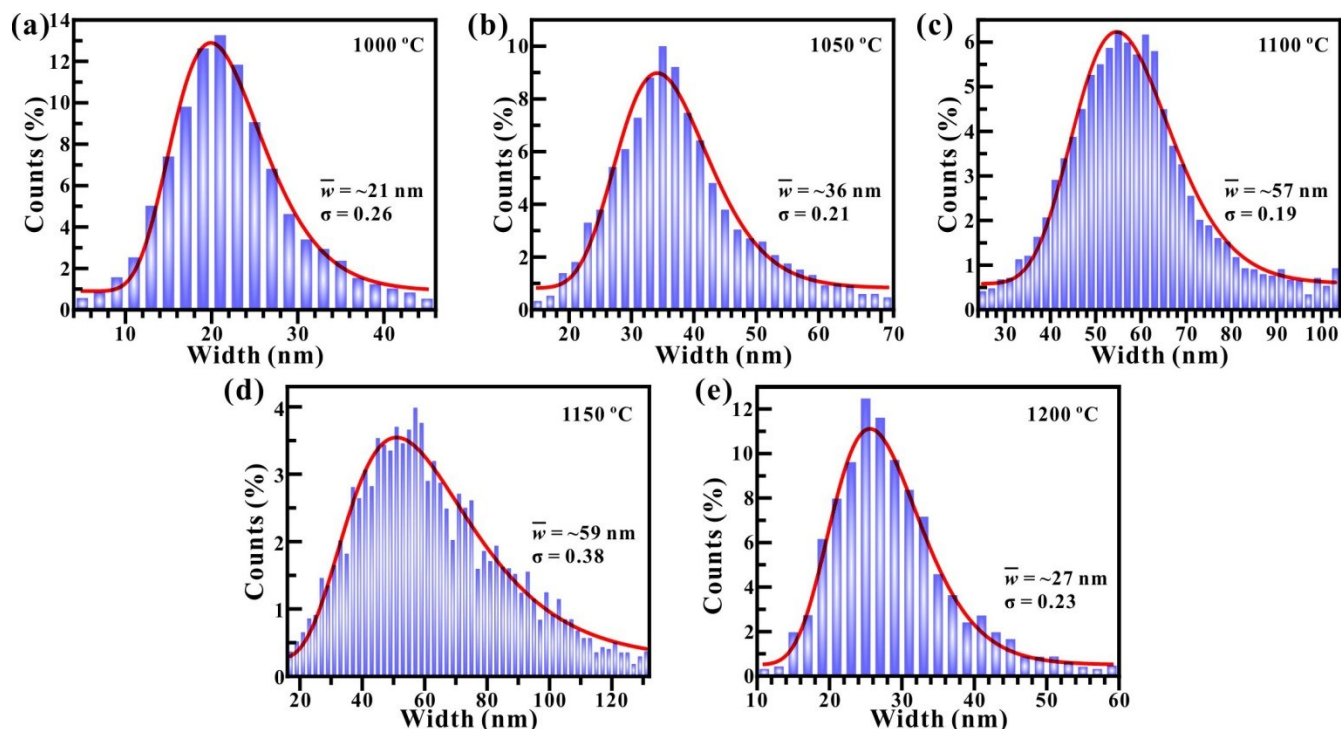

**Figure S1.** Statistical histograms of the width distributions of 1D Magnéli-phase  $\text{Mo}_4\text{O}_{11}$  nanorods synthesized at various temperatures of (a) 1000 °C, (b) 1050 °C, (c) 1100 °C, (d) 1150 °C, and (e) 1200 °C. All the data are fitted by a log-normal distribution function.

| Temperature | Average length of the 1D nanorods | Thickness of the buffer layer |
|-------------|-----------------------------------|-------------------------------|
| 1000 °C     | 249.7 nm                          | 165.9 nm                      |
| 1050 °C     | 422.7 nm                          | 145.1 nm                      |
| 1100 °C     | 845.4 nm                          | 140.2 nm                      |
| 1150 °C     | 830.3 nm                          | 133.4 nm                      |
| 1200 °C     | 1053.8 nm                         | 55.4 nm                       |

**Table S1.** Average lengths of the 1D Mo<sub>4</sub>O<sub>11</sub> nanorods and thicknesses of the MoO<sub>x</sub> buffer layers synthesized on ITO/glass substrates at 1000, 1050, 1100, 1150, and (e) 1200 °C.

| Temperature | Percentage of orthorhombic ( $\alpha$ ) phase | Percentage of monoclinic ( $\beta$ ) phase |
|-------------|-----------------------------------------------|--------------------------------------------|
| 1000 °C     | ~10 %                                         | ~90 %                                      |
| 1050 °C     | ~98 %                                         | ~2 %                                       |
| 1100 °C     | ~95 %                                         | ~5 %                                       |
| 1150 °C     | ~93 %                                         | ~7 %                                       |
| 1200 °C     | ~53 %                                         | ~47 %                                      |

**Table S2.** Various composition percentages of the two orthorhombic ( $\alpha$ ) and monoclinic ( $\eta$ ) phases at 1000, 1050, 1100, 1150, and (e) 1200 °C, for the 1D Magnéli-phase Mo<sub>4</sub>O<sub>11</sub> nanorods.

| Temperature | Raman band (cm <sup>-1</sup> )                                       |
|-------------|----------------------------------------------------------------------|
| 1000 °C     | 202, 253, 323, 358, 412, 812, 894, 934, 992                          |
| 1050 °C     | 118, 157, 189, 322, 412, 442, 799, 890, 936                          |
| 1100 °C     | 120, 171, 275, 333, 373, 422, 442, 720, 785, 820, 900, 993           |
| 1150 °C     | 120, 145, 191, 234, 280, 335, 374, 444, 662, 818, 897, 992           |
| 1200 °C     | 121, 148, 197, 225, 284, 339, 356, 455, 491, 564, 661, 734, 821, 995 |

**Table S3.** Various Raman bands of the 1D Mo<sub>4</sub>O<sub>11</sub> nanorods synthesized at 1000, 1050, 1100, 1150, and (e) 1200 °C.

| Raman band           | Active mode                       | Vibration characteristics                       |
|----------------------|-----------------------------------|-------------------------------------------------|
| 89 cm <sup>-1</sup>  | A <sub>g</sub>                    | translational rigid MoO <sub>4</sub> chain mode |
| 100 cm <sup>-1</sup> | B <sub>3g</sub>                   | translational rigid MoO <sub>4</sub> chain mode |
| 116 cm <sup>-1</sup> | B <sub>2g</sub>                   | translational rigid MoO <sub>4</sub> chain mode |
| 129 cm <sup>-1</sup> | B <sub>3g</sub>                   | translational rigid MoO <sub>4</sub> chain mode |
| 159 cm <sup>-1</sup> | A <sub>g</sub> /B <sub>1g</sub>   | translational rigid MoO <sub>4</sub> chain mode |
| 197 cm <sup>-1</sup> | B <sub>2g</sub>                   | O=Mo=O twist                                    |
| 216 cm <sup>-1</sup> | A <sub>g</sub>                    | rotational rigid MoO <sub>4</sub> chain mode    |
| 247 cm <sup>-1</sup> | B <sub>3g</sub>                   | O=Mo=O twist                                    |
| 285 cm <sup>-1</sup> | B <sub>2g</sub>                   | O=M=O wagging                                   |
| 293 cm <sup>-1</sup> | B <sub>3g</sub>                   | O=M=O wagging                                   |
| 334 cm <sup>-1</sup> | A <sub>g</sub> , B <sub>1g</sub>  | O–M–O bend                                      |
| 366 cm <sup>-1</sup> | A <sub>1g</sub>                   | O–M–O scissor                                   |
| 376 cm <sup>-1</sup> | B <sub>1g</sub> ,                 | O–M–O scissor                                   |
| 380 cm <sup>-1</sup> | B <sub>1g</sub>                   | O–M–O scissor                                   |
| 473 cm <sup>-1</sup> | A <sub>g</sub>                    | O–M–O stretch and bend                          |
| 667 cm <sup>-1</sup> | B <sub>2g</sub> , B <sub>3g</sub> | O–M–O stretch                                   |
| 823 cm <sup>-1</sup> | A <sub>g</sub>                    | M=O stretch                                     |
| 996 cm <sup>-1</sup> | A <sub>g</sub>                    | M=O stretch                                     |

**Table S4.** Varying Raman bands, corresponding active modes, and vibration characteristics of MoO<sub>1-x</sub> [34].
